# Supplementary material
Source: PubMed Central journal article supplement (PMC3683712)
Supplement: 1308336110_pnas.201308336SI.pdf [file 1308336110_pnas.201308336SI.pdf]

# Supporting Information

Sun et al. 10.1073/pnas.1308336110

| Primers     |    | Sequences                                    | size   |
|-------------|----|----------------------------------------------|--------|
| <i>Tshr</i> | WT | 3218: 5' - CAG GGT GGA GAC GCA CAC TC - 3'   | 590 bp |
|             |    | 3219: 5' - AGA GAG TCC CAC AAC AGT C - 3'    |        |
|             | KO | 124: 5' - AAG GTG ACC CTG AAG TTC ATC TG -3' | 547 bp |
|             |    | 671: 5' - AAC TCC AGC AGG ACC ATG TG - 3'    |        |
| <i>Tnfα</i> | WT | 0745: 5' - GCA CAG AAA GCA TGA TCC G - 3'    | 146 bp |
|             |    | 0746: 5' - TAG ACA GAA GAG CGT GGT GG - 3'   |        |
|             | KO | 0013: 5' - CTT GGG TGG AGA GGC TAT TC - 3'   | 280 bp |
|             |    | 0014: 5' - AGG TGA GAT GAC AGG AGA TC - 3'   |        |

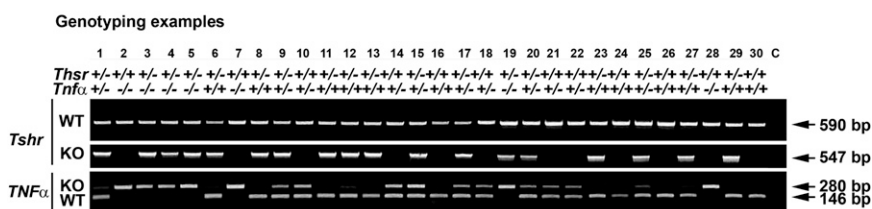

**Fig. S1.** Primer sequences and expected amplicon sizes used for genotyping compound mutant mice for thyroid-stimulating hormone receptor (*Tshr*) and *Tnfα* genes. Agarose gel analyses of PCR products are shown for 30 randomly selected mice.
